# Supplementary material
Source: MDPI journal article supplement (https://www.mdpi.com/2073-4433/10/10/565)
Supplement: s1 [file s1]

## Supplementary Material

### Text S1 Source implication

Figure S1 shows the scatter plots of toluene to benzene ratio at ZY and JX. The toluene to benzene (T/B) ratio is often used to indicate the possible sources of AHs [29,35,76]. For example, the T/B value of  $\sim 2.0$  implies vehicle exhaust [23,77], 0.6 indicates biomass burning [78], 0.7 indicates coal burning [31], and 4.3 indicates industrial solvent usage [76,79]. Significant correlations ( $p < 0.01$ ) were observed between the two species at both sites. As shown in Figure S1, at both sites, all the samples were clustered near the lines of industrial solvent, vehicle exhaust, and biomass/coal burning. This indicated that AHs at both sites have the same emission sources of industrial solvent, vehicle exhaust, and biomass/coal burning. The average T/B ratios were  $2.5 \pm 1.2$  and  $1.9 \pm 1.1$  at ZY and JX, respectively, suggesting that vehicular emissions were the primary sources for AHs at the two sites.

### Text S2 Identification of factor number

According to previous discussion, industrial solvent, vehicle exhaust, and biomass/coal burning were determined to be the dominant sources of AHs at ZY and JX. Then, three to six factors were tested with the input data, and bootstrap (BS) and displacement (DISP) analyses were run to evaluate the model results. The PMF model error estimation results are listed in Table S1. In PMF model, BS analysis was applied to identify whether a small set of observations existed that could disproportionately influence the solution [45]. The BS analysis was run for 100 times, and mapping over 80% of the runs indicated that the number of factors was appropriate. As shown in Table S1, when the factor numbers were three and four, all factors mapped for more than 80%. Moreover, no swap occurred with DISP, indicating that the solutions of three and four factors were stable and acceptable. For the solution of four factors,  $Q(\text{robust})$  value (6906.4) was lower than that of three factors (7974.7), and the source profiles were more reasonable and interpretable. Hence, the solution of four factors was determined to be optimum.

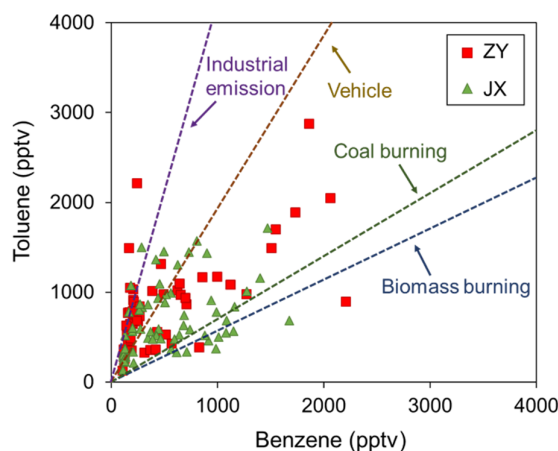

**Figure S1.** Scatter plots of toluene to benzene ratio at ZY and JX.

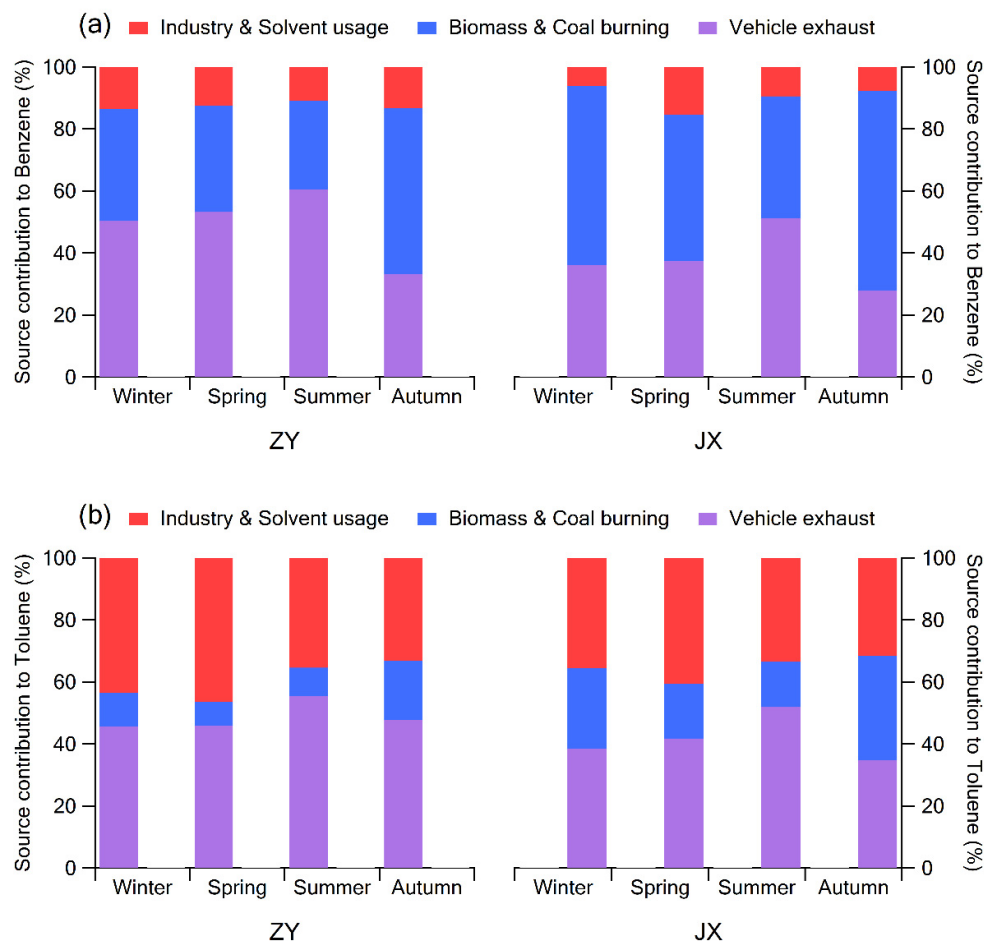

**Figure S2.** Source contributions to (a) benzene and (b) toluene in various seasons at ZY and JX.

**Table S1.** Method detection limit (MDL), range (minimum-maximum) and average concentration  $\pm$  SD of VOC species other than AHs at ZY and JX during the sampling period (Units: pptv), ND = below detection limit.

| Species                | MDL | ZY (N = 66) * |                 | JX (N = 67) * |                 |
|------------------------|-----|---------------|-----------------|---------------|-----------------|
|                        |     | Range         | mean $\pm$ SD   | Range         | mean $\pm$ SD   |
| ethene                 | 39  | 217–8754      | 3456 $\pm$ 2599 | 496–8327      | 3372 $\pm$ 2277 |
| ethyne                 | 57  | 728–9669      | 3669 $\pm$ 3071 | 428–9865      | 3780 $\pm$ 3029 |
| ethane                 | 41  | 706–8378      | 2808 $\pm$ 1490 | 787–6057      | 2363 $\pm$ 1098 |
| propene                | 31  | 79–1726       | 510 $\pm$ 384   | 118–1612      | 494 $\pm$ 317   |
| propane                | 31  | 509–9735      | 3148 $\pm$ 2077 | 467–7011      | 2521 $\pm$ 1338 |
| <i>i</i> -butane       | 21  | 385–7679      | 2469 $\pm$ 1863 | 111–6585      | 2030 $\pm$ 1710 |
| 1-butene               | 17  | 222–1611      | 552 $\pm$ 284   | 232–2490      | 673 $\pm$ 418   |
| 1,3-butadiene          | 7   | 14–746        | 191 $\pm$ 147   | 10–835        | 169 $\pm$ 141   |
| <i>n</i> -butane       | 21  | 102–6621      | 2909 $\pm$ 1776 | 143–7461      | 1759 $\pm$ 1558 |
| <i>trans</i> -2-butene | 13  | 78–580        | 159 $\pm$ 102   | 27–254        | 128 $\pm$ 39    |
| <i>cis</i> -2-butene   | 11  | 114–418       | 182 $\pm$ 62    | 87–232        | 160 $\pm$ 36    |
| 3-methyl-1-butene      | 2   | 19–146        | 74 $\pm$ 33     | 19–115        | 71 $\pm$ 31     |
| <i>i</i> -pentane      | 14  | 99–5500       | 1121 $\pm$ 1097 | 15–4518       | 918 $\pm$ 683   |
| 1-pentene              | 20  | 22–632        | 227 $\pm$ 178   | ND–217        | 77 $\pm$ 44     |
| 2-methyl-1-butene      | 3   | 25–1240       | 288 $\pm$ 145   | 13–577        | 131 $\pm$ 185   |
| <i>n</i> -pentane      | 8   | 169–5173      | 1459 $\pm$ 1212 | 188–5087      | 1067 $\pm$ 994  |

|                                  |    |          |             |          |             |
|----------------------------------|----|----------|-------------|----------|-------------|
| isoprene                         | 13 | 10–6828  | 1762 ± 1007 | 14–7828  | 2198 ± 1907 |
| <i>trans</i> -2-pentene          | 10 | 9–1258   | 250 ± 158   | 23–1118  | 289 ± 328   |
| <i>cis</i> -2-pentene            | 6  | 23–1419  | 353 ± 348   | 15–1088  | 354 ± 341   |
| 2-methyl-2-butene                | 2  | 5–298    | 85 ± 81     | 34–70    | 51 ± 9      |
| 2,2-dimethylbutane               | 14 | 35–97    | 57 ± 13     | 17–224   | 48 ± 41     |
| cyclopentene                     | 8  | 9–144    | 50 ± 34     | 15–41    | 27 ± 11     |
| 4-methyl-1-pentene               | 5  | 15–88    | 31 ± 17     | 17–438   | 80 ± 76     |
| cyclopentane                     | 8  | 27–279   | 86 ± 62     | 25–800   | 103 ± 154   |
| 2,3-dimethylbutane               | 12 | 31–1271  | 250 ± 371   | 12–1247  | 357 ± 235   |
| 2-methylpentane                  | 8  | 98–1771  | 420 ± 307   | 9–1788   | 304 ± 332   |
| 3-methylpentane                  | 7  | 7–2494   | 367 ± 422   | 22–1264  | 335 ± 202   |
| 2-methyl-1-pentene               | 5  | 18–629   | 238 ± 125   | 58–776   | 278 ± 136   |
| <i>n</i> -hexane                 | 6  | 104–895  | 353 ± 203   | 41–251   | 121 ± 41    |
| methylcyclopentane               | 9  | 70–2783  | 950 ± 415   | 159–1109 | 297 ± 205   |
| 2,4-dimethylpentane              | 4  | 159–1106 | 281 ± 176   | 121–892  | 262 ± 159   |
| cyclohexane                      | 16 | 121–941  | 274 ± 154   | 21–1536  | 272 ± 262   |
| 2-methylhexane                   | 6  | 21–629   | 207 ± 163   | 69–283   | 192 ± 78    |
| 2,3-dimethylpentane              | 9  | 178–771  | 394 ± 216   | 169–1150 | 535 ± 401   |
| 3-methylhexane                   | 6  | 169–1098 | 553 ± 390   | 154–2528 | 458 ± 465   |
| 2,2,4-trimethylpentane           | 9  | 160–974  | 367 ± 236   | 163–353  | 194 ± 28    |
| <i>n</i> -heptane                | 10 | 162–489  | 203 ± 58    | 146–242  | 190 ± 17    |
| methylcyclohexane                | 8  | 156–786  | 225 ± 100   | 114–558  | 203 ± 88    |
| 2,3,4-trimethylpentane           | 6  | 114–339  | 194 ± 60    | 184–362  | 211 ± 25    |
| 2-methylheptane                  | 4  | 184–253  | 210 ± 19    | 182–314  | 210 ± 26    |
| 3-methylheptane                  | 5  | 183–244  | 207 ± 16    | 183–747  | 236 ± 82    |
| <i>n</i> -octane                 | 6  | 183–523  | 231 ± 62    | 80–437   | 172 ± 92    |
| <i>n</i> -nonane                 | 6  | 80–330   | 166 ± 85    | 91–771   | 213 ± 115   |
| <i>n</i> -decane                 | 6  | 91–760   | 204 ± 110   | 79–422   | 149 ± 88    |
| $\alpha$ -pinene                 | 6  | 81–645   | 151 ± 113   | 30–249   | 133 ± 63    |
| $\beta$ -pinene                  | 6  | 30–372   | 141 ± 74    | 34–633   | 225 ± 145   |
| HFC-134a                         | 7  | 58–129   | 96 ± 17     | 30–161   | 87 ± 30     |
| HFC-152a                         | 7  | ND–55    | 19 ± 12     | ND–46    | 15 ± 13     |
| HCFC-22                          | 21 | 152–537  | 298 ± 164   | 61–530   | 196 ± 109   |
| CFC-12                           | 16 | 29–887   | 452 ± 219   | 116–1845 | 828 ± 464   |
| CH <sub>3</sub> Cl               | 20 | 131–2266 | 719 ± 440   | 316–2208 | 822 ± 577   |
| CFC-114                          | 2  | ND–129   | 35 ± 27     | ND–132   | 43 ± 32     |
| H-1211                           | 2  | ND–12    | 4 ± 2       | ND–25    | 7 ± 5       |
| CH <sub>3</sub> Br               | 2  | ND–19    | 8 ± 4       | ND–33    | 17 ± 8      |
| CFC-11                           | 16 | 51–479   | 276 ± 125   | 60–319   | 194 ± 153   |
| HCFC-141b                        | 16 | 32–256   | 94 ± 60     | 17–242   | 89 ± 56     |
| CH <sub>3</sub> I                | 6  | ND–29    | 12 ± 4      | ND–46    | 11 ± 9      |
| CH <sub>2</sub> Cl <sub>2</sub>  | 3  | 229–4883 | 1480 ± 900  | 142–3524 | 1087 ± 607  |
| CFC-113                          | 7  | 58–104   | 82 ± 10     | 46–112   | 79 ± 12     |
| CHCl <sub>3</sub>                | 5  | 50–1205  | 352 ± 147   | 47–1916  | 297 ± 196   |
| CH <sub>3</sub> CCl <sub>3</sub> | 2  | 44–129   | 83 ± 22     | 69–138   | 89 ± 14     |
| 1,2-DCE                          | 5  | 7–294    | 85 ± 49     | 6–331    | 97 ± 53     |
| CCl <sub>4</sub>                 | 2  | 3–172    | 76 ± 43     | 3–165    | 69 ± 35     |
| CH <sub>2</sub> Br <sub>2</sub>  | 2  | 3–165    | 71 ± 51     | 3–178    | 78 ± 44     |
| C <sub>2</sub> HCl <sub>3</sub>  | 2  | ND–45    | 9 ± 12      | ND–42    | 10 ± 9      |
| CHBr <sub>2</sub> Cl             | 2  | ND–88    | 19 ± 14     | ND–61    | 18 ± 11     |
| C <sub>2</sub> Cl <sub>4</sub>   | 3  | 4–354    | 83 ± 79     | 5–396    | 84 ± 99     |

\* N = number of samples.

**Table S2.** Summary of error estimation results of PMF model.

| Diagnostic                    | 3 factors | 4 factors | 5 factors | 6 factors |
|-------------------------------|-----------|-----------|-----------|-----------|
| Q(true)                       | 8384.5    | 7075.8    | 6002.1    | 5089.8    |
| Q(robust)                     | 7974.7    | 6906.4    | 5873.8    | 5004.9    |
| Factors with BS mapping < 80% | NO        | NO        | Yes       | Yes       |
| DISP %dQ                      | < 0.1%    | < 0.1%    | < 0.1%    | < 0.1%    |
| DISP swaps                    | 0         | 0         | 0         | 0         |

**Table S3.** Seasonal mean values of meteorological parameters in Wuhan during the sampling period (mean  $\pm$  SD).

| Season | Temperature (°C) | Relative Humidity (%) | Wind Speed (m/s) | Sea Level Pressure (hPa) | Boundary Layer Height (m) |
|--------|------------------|-----------------------|------------------|--------------------------|---------------------------|
| Winter | 13.0 $\pm$ 5.0   | 51.3 $\pm$ 17.1       | 3.5 $\pm$ 1.4    | 1020.6 $\pm$ 5.8         | 1023.8 $\pm$ 268.6        |
| Spring | 21.3 $\pm$ 4.7   | 58.0 $\pm$ 20.5       | 3.7 $\pm$ 1.4    | 1009.2 $\pm$ 4.0         | 1343.5 $\pm$ 544.6        |
| Summer | 33.0 $\pm$ 3.5   | 66.0 $\pm$ 11.8       | 4.1 $\pm$ 1.9    | 998.5 $\pm$ 2.1          | 1223.0 $\pm$ 302.3        |
| Autumn | 16.0 $\pm$ 4.7   | 58.8 $\pm$ 19.7       | 2.4 $\pm$ 1.6    | 1020.3 $\pm$ 5.2         | 905.3 $\pm$ 176.6         |

**Table S4.** Atmospheric lifetime of BTEX with respect to reaction with hydroxyl radical (OH) [75].

| Species          | Atmospheric lifetime * |
|------------------|------------------------|
| Benzene          | 9.4 days               |
| Toluene          | 1.9 days               |
| Ethylbenzene     | 1.6 days               |
| <i>m</i> -xylene | 11.8 h                 |
| <i>p</i> -xylene | 19.4 h                 |
| <i>o</i> -xylene | 20.3 h                 |

\* Concentration used in calculations: [OH] =  $10^6$  molecule  $\text{cm}^{-3}$ .

**Table S5.** Seasonal mean values of methyl chloride ( $\text{CH}_3\text{Cl}$ ) at ZY and JX during the sampling period (mean  $\pm$  95% C.I.).

| Season | ZY (pptv)      | JX (pptv)      |
|--------|----------------|----------------|
| Winter | 814 $\pm$ 50   | 1172 $\pm$ 172 |
| Spring | 698 $\pm$ 49   | 820 $\pm$ 51   |
| Summer | 340 $\pm$ 197  | 379 $\pm$ 201  |
| Autumn | 1360 $\pm$ 448 | 1046 $\pm$ 173 |

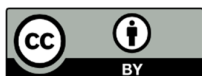

© 2019 by the authors. Submitted for possible open access publication under the terms and conditions of the Creative Commons Attribution (CC BY) license (<http://creativecommons.org/licenses/by/4.0/>).
